# Supplementary material for: [C(NH2)3]2S2O8: combining delocalized and localized π-conjugate units to achieve strong optical anisotropy
Source: Royal Society of Chemistry journal article supplement (doi:10.1039/d2qi01561g), 2022-01-01
Supplement: d2qi01561g1.pdf [file d2qi01561g1.pdf]

## Supporting Information

### **[C(NH<sub>2</sub>)<sub>3</sub>]<sub>2</sub>S<sub>2</sub>O<sub>8</sub>: Combining Delocalized and Localizes $\pi$ -Conjugate Units Achieving Strong Optical Anisotropy**

Man Zhang,<sup>a</sup> Bingbing Zhang,<sup>a</sup> Daqing Yang,<sup>a</sup> and Ying Wang\*<sup>a</sup>

<sup>a</sup> *College of Chemistry and Environmental Science, Hebei University, Baoding 071002, China. Email: wangy@hbu.edu.cn.*

#### Table of contents

|                                                                                                                                                                                                                 |    |
|-----------------------------------------------------------------------------------------------------------------------------------------------------------------------------------------------------------------|----|
| <b>Table S1.</b> Atomic coordinates and Ueq for [C(NH <sub>2</sub> ) <sub>3</sub> ] <sub>2</sub> S <sub>2</sub> O <sub>8</sub> . -----                                                                          | S2 |
| <b>Table S2.</b> Bond lengths [Å] and angles [deg] for [C(NH <sub>2</sub> ) <sub>3</sub> ] <sub>2</sub> S <sub>2</sub> O <sub>8</sub> . -----                                                                   | S2 |
| <b>Table S3.</b> Hydrogen bonds with H..A < r(A) + 2.000 Angstroms and $\angle$ DHA > 110 deg for [C(NH <sub>2</sub> ) <sub>3</sub> ] <sub>2</sub> S <sub>2</sub> O <sub>8</sub> (D = Donor, A = Acceptor)----- | S3 |
| <b>Figure S1.</b> The photo of single crystals of [C(NH <sub>2</sub> ) <sub>3</sub> ] <sub>2</sub> S <sub>2</sub> O <sub>8</sub> . -----                                                                        | S4 |
| <b>Figure S2.</b> The hydrogen bonds between guanidine cation and [S <sub>2</sub> O <sub>8</sub> ] <sup>2-</sup> groups. -----                                                                                  | S4 |
| <b>Figure S3.</b> SEM images and EDX microanalysis for [C(NH <sub>2</sub> ) <sub>3</sub> ] <sub>2</sub> S <sub>2</sub> O <sub>8</sub> . -----                                                                   | S5 |
| <b>Figure S4.</b> The TG and DSC curves of [C(NH <sub>2</sub> ) <sub>3</sub> ] <sub>2</sub> S <sub>2</sub> O <sub>8</sub> . -----                                                                               | S5 |
| <b>Figure S5.</b> The IR spectra for [C(NH <sub>2</sub> ) <sub>3</sub> ] <sub>2</sub> S <sub>2</sub> O <sub>8</sub> . -----                                                                                     | S6 |
| <b>Figure S6.</b> The arrangement of guanidine groups. -----                                                                                                                                                    | S6 |
| <b>Figure S7.</b> Band structure of [C(NH <sub>2</sub> ) <sub>3</sub> ] <sub>2</sub> S <sub>2</sub> O <sub>8</sub> . -----                                                                                      | S7 |
| <b>Figure S8.</b> Partial density of states diagram of independent oxygen atoms. -----                                                                                                                          | S8 |
| <b>Figure S9.</b> The frontier molecular orbitals of structural units in [C(NH <sub>2</sub> ) <sub>3</sub> ] <sub>2</sub> S <sub>2</sub> O <sub>8</sub> . -----                                                 | S9 |

**Table S1.** Atomic coordinates and  $U_{eq}$  for  $[C(NH_2)_3]_2S_2O_8$ .  $U_{eq}$  is defined as one third of the trace of the orthogonalized  $U_{ij}$  tensor.

|     | $x$         | $y$         | $z$         | $U_{eq}$   |
|-----|-------------|-------------|-------------|------------|
| S1  | 0.77780(15) | 0.60300(15) | 0.09383(8)  | 0.0305(4)  |
| O1  | 0.7418(4)   | 0.7635(4)   | 0.04626(19) | 0.0332(9)  |
| O2  | 0.6758(5)   | 0.4956(4)   | 0.0585(2)   | 0.0411(11) |
| O3  | 0.9306(4)   | 0.5697(5)   | 0.0752(3)   | 0.0575(12) |
| O4  | 0.7469(4)   | 0.6482(4)   | 0.17975(19) | 0.0463(11) |
| N1  | 0.5658(6)   | 0.8338(5)   | 0.3173(3)   | 0.0661(17) |
| H1A | 0.616310    | 0.826952    | 0.270536    | 0.079      |
| H1B | 0.534323    | 0.919588    | 0.334508    | 0.079      |
| N2  | 0.4576(6)   | 0.7249(6)   | 0.4340(3)   | 0.0609(15) |
| H2A | 0.425744    | 0.810800    | 0.450772    | 0.073      |
| H2B | 0.438315    | 0.646164    | 0.463745    | 0.073      |
| N3  | 0.5843(6)   | 0.5813(5)   | 0.3366(3)   | 0.0564(14) |
| H3A | 0.634859    | 0.573238    | 0.289991    | 0.068      |
| H3B | 0.564587    | 0.502994    | 0.366635    | 0.068      |
| C1  | 0.5368(7)   | 0.7136(7)   | 0.3622(4)   | 0.0425(15) |

**Table S2.** Bond lengths [ $\text{\AA}$ ] and angles [deg] for  $[C(NH_2)_3]_2S_2O_8$ .

| Atom–Atom           | Length [ $\text{\AA}$ ] | Atom–Atom–Atom | Angle [ $^\circ$ ] |
|---------------------|-------------------------|----------------|--------------------|
| S1–O4               | 1.427(3)                | O4–S1–O3       | 115.8(2)           |
| S1–O3               | 1.427(4)                | O4–S1–O2       | 115.3(2)           |
| S1–O2               | 1.434(4)                | O3–S1–O2       | 113.0(3)           |
| S1–O1               | 1.647(3)                | O4–S1–O1       | 98.01(18)          |
| O1–O1 <sup>#1</sup> | 1.470(6)                | O3–S1–O1       | 106.1(2)           |
| N1–C1               | 1.308(7)                | O2–S1–O1       | 106.60(19)         |
| N1–H1A              | 0.8600                  | O1–O1–S1       | 107.6(3)           |
| N1–H1B              | 0.8600                  | C1–N1–H1A      | 120.0              |
| N2–C1               | 1.330(7)                | C1–N1–H1B      | 120.0              |
| N2–H2A              | 0.8600                  | H1A–N1–H1B     | 120.0              |
| N2–H2B              | 0.8600                  | C1–N2–H2A      | 120.0              |
| N3–C1               | 1.318(7)                | C1–N2–H2B      | 120.0              |
| N3–H3A              | 0.8600                  | H2A–N2–H2B     | 120.0              |
| N3–H3B              | 0.8600                  | C1–N3–H3A      | 120.0              |
|                     |                         | C1–N3–H3B      | 120.0              |
|                     |                         | H3A–N3–H3B     | 120.0              |
|                     |                         | N1–C1–N3       | 120.7(5)           |
|                     |                         | N1–C1–N2       | 119.7(6)           |
|                     |                         | N3–C1–N2       | 119.6(6)           |

Symmetry transformations used to generate equivalent atoms: #1)  $x-1/2, y, -z+3/2$ ; #2)  $x+1/2, y, -z+3/2$ .

**Table S3.** Hydrogen bonds with  $H..A < r(A) + 2.000$  Angstroms and  $\angle DHA > 110$  deg for  $[C(NH_2)_3]_2S_2O_8$  (D = Donor, A = Acceptor).

| D-H                       | d(D-H) | d(H..A) | $\angle DHA$ | d(D..A) |
|---------------------------|--------|---------|--------------|---------|
| N1-H1A...O4               | 0.86   | 2.43    | 3.159(6)     | 142.4   |
| N1-H1B...O3 <sup>#1</sup> | 0.86   | 2.15    | 2.952(6)     | 154.1   |
| N2-H2A...O3 <sup>#1</sup> | 0.86   | 2.35    | 3.093(6)     | 145.2   |
| N2-H2A...O4 <sup>#2</sup> | 0.86   | 2.48    | 3.058(6)     | 125.0   |
| N2-H2B...O2 <sup>#3</sup> | 0.86   | 2.20    | 3.013(6)     | 158.0   |
| N3-H3A...O4               | 0.86   | 2.10    | 2.909(6)     | 156.6   |
| N3-H3B...O2 <sup>#4</sup> | 0.86   | 2.05    | 2.910(6)     | 175.9   |

Symmetry transformations used to generate equivalent atoms:

#1: 1-Y, 2-X, 0.5-Z; #2: -0.5+X, 1.5-Y, 0.75-Z; #3: 1-X, 1-Y, 0.5+Z; #4: 1-Y, 1-X, 0.5-Z;

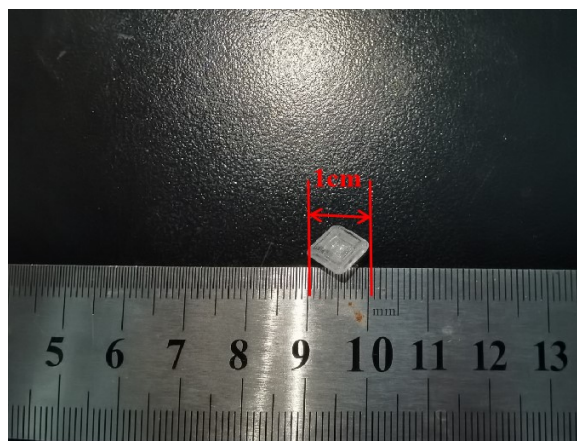

**Figure S1.** The photo of single crystals of  $[\text{C}(\text{NH}_2)_3]_2\text{S}_2\text{O}_8$ .

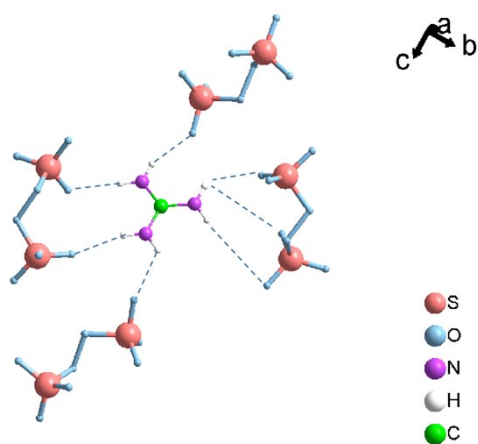

**Figure S2.** The hydrogen bonds between guanidinium cation and  $[\text{S}_2\text{O}_8]$  groups.

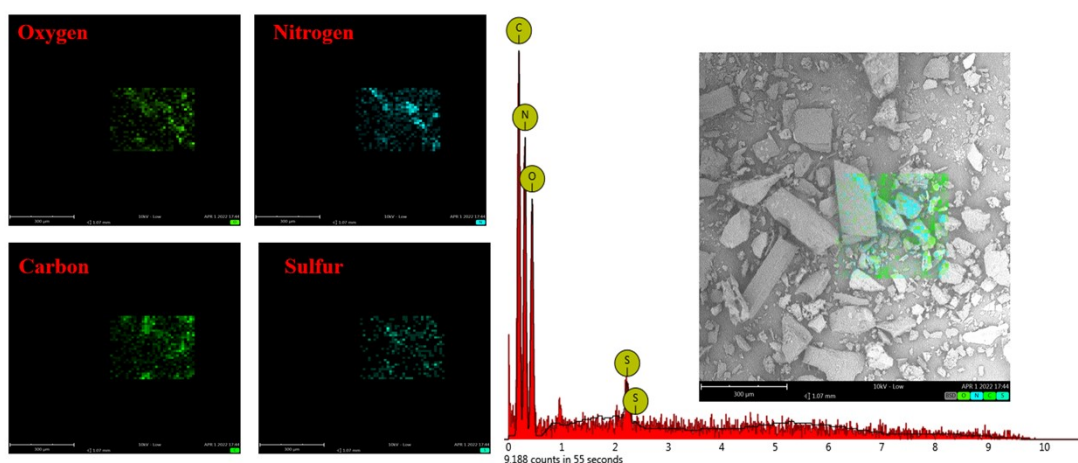

**Figure S3.** SEM images and EDX.microanalysis for  $[\text{C}(\text{NH}_2)_3]_2\text{S}_2\text{O}_8$ . The mole ratio of the elements is C: N: S: O=12.6 : 26.6 : 2.3 : 58.4. Noted that the EDX only provides semi-quantitative results.

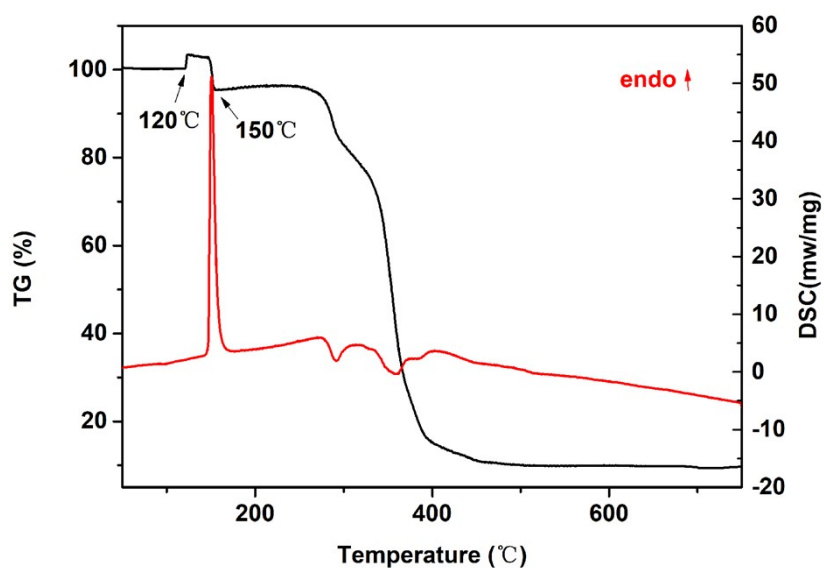

**Figure S4.** The TGA and DSC curves of  $[\text{C}(\text{NH}_2)_3]_2\text{S}_2\text{O}_8$ . The sudden change (120~150 °C) in TG curve may be attributed to the explosive decomposability of peroxides.

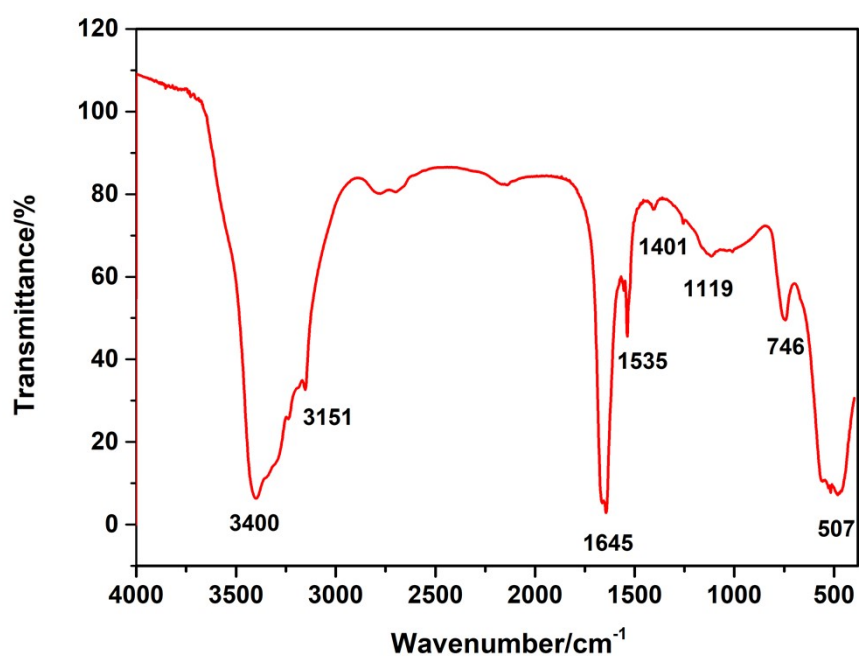

**Figure S5.** The IR spectrum for  $[\text{C}(\text{NH}_2)_3]_2\text{S}_2\text{O}_8$ .

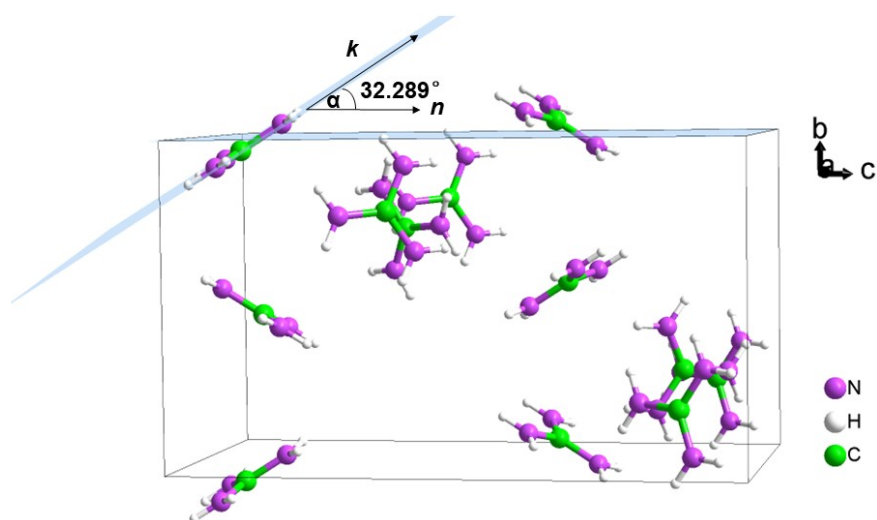

**Figure S6.** The arrangement of guanidine groups.  $k$  represents the direction of guanidine planes,  $n$  represents the optical axis direction, and  $\alpha$  indicates the angle between guanidine plane and optical axis.

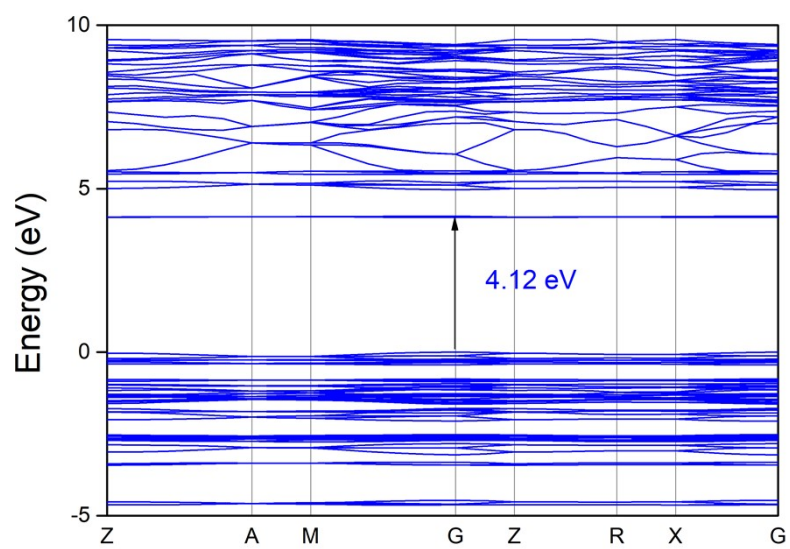

**Figure S7.** Band structure of  $[\text{C}(\text{NH}_2)_3]_2\text{S}_2\text{O}_8$ .

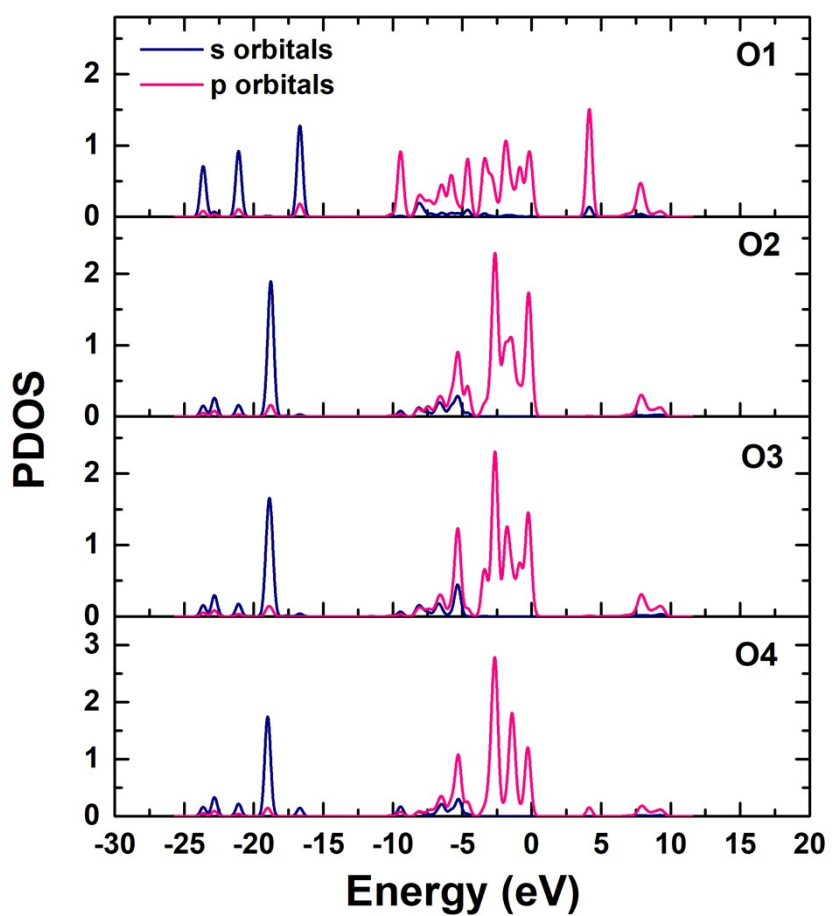

Figure S8. Partial density of states diagram of independent oxygen atoms.



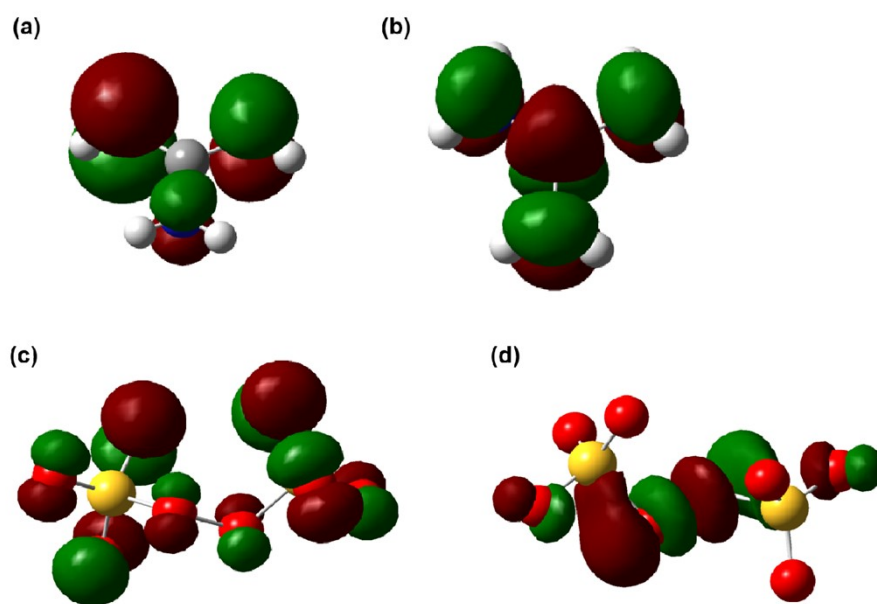

**Figure S9.** The frontier molecular orbitals of structural units in  $[\text{C}(\text{NH}_2)_3]_2\text{S}_2\text{O}_8$ . (a) HOMO and (b) LUMO diagrams of  $[\text{C}(\text{NH}_2)_3]$  cations; (c) and (d) are HOMO and LUMO diagrams of  $[\text{S}_2\text{O}_8]$  units.
